# Supplementary material for: An Alternative Method to Determine the Quantum Yield of the Excited Triplet State Using Laser Flash Photolysis
Source: MDPI journal article supplement (doi:10.3390/photonics10040409), 2023-04-06
Supplement: s1 [file s1]

# Supplementary material

## **An alternative method to determine the quantum yield of the excited triplet state using Laser Flash Photolysis**

Iouri Evgenievitch Borissevitch<sup>1,2,\*</sup>, Eli Silveira-Alves Jr<sup>3</sup>,  
Claudio Gabriel Lemos Almeida<sup>4</sup>, Guilherme Rocha Lino de Souza<sup>5</sup>,  
Svyatoslav Sergeevich Sokolov<sup>6</sup>, Pablo José Gonçalves<sup>2,3,\*\*</sup>

<sup>1</sup>Departamento de Física, Faculdade de Filosofia, Ciências e Letras de Ribeirão Preto, Universidade de São Paulo, Ribeirão Preto, Brazil.

<sup>2</sup>Instituto de Física, Universidade Federal de Goiás, Goiânia, Brazil.

<sup>3</sup>Instituto de Química, Universidade Federal de Goiás, Goiânia, Brazil,

<sup>4</sup>Escola de Engenharia Elétrica, Mecânica e de Computação, Universidade Federal de Goiás, Goiânia, Brazil.

<sup>5</sup>Instituto de Ciências Biológicas, Universidade Federal de Goiás – UFG, Goiânia – GO, Brazil.

<sup>6</sup>B. Verkin Institute for Low Temperature Physics and Engineering of the National Academy of Sciences of Ukraine 47 Nauky ave, 61103 Kharkiv, Ukraine.

.

Authors to whom correspondence should be addressed:

\*iourib@ffclrp.usp.br and \*\*pablo@ufg.br

## Supplementary material

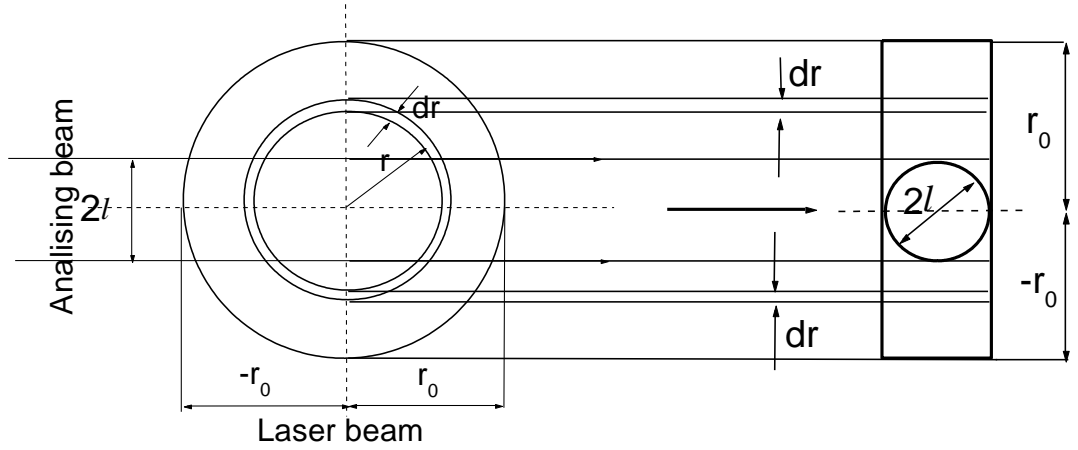

**SI-1:** Scheme of propagation of the exciting and analyzing beams, used for calculation of  $\varphi_r$  value from spectroscopic data.

The number of exciting photons in the cylindrical volume element  $dV_r$  is

$$dn_{ex}(r, z) = GF(r, z)dV_r$$

where  $dV_r$  is equal to

$$dV_r = 4\pi l r dr$$

Here  $r$  is the cylinder radius,  $dr$  is its thickness and  $2l$  is its height, where  $l$  is the radius of the analyzing beam.

$GF(r, z)$  is the spatial distribution of laser pulse intensity, which, taking into account the cylindrical symmetry of the pulse, is

$$GF(r, z) = C \times \exp\left(-\frac{r^2}{2\zeta^2}\right)$$

The  $C$  value is determined from normalization by the volume

$$C \int_0^{2\pi} d\theta \int_0^{r_0} \exp\left(-\frac{r^2}{2\zeta^2}\right) r dr \int_{-l}^l dz = 1$$

And

$$C = \frac{1}{4\pi l \zeta^2 \left[1 - \exp\left(-\frac{r_0^2}{2\zeta^2}\right)\right]}$$

Finally

$$dn_{ex} = \frac{n_{ex0}}{4\pi l \zeta^2 \left[1 - \exp\left(-\frac{r_0^2}{2\zeta^2}\right)\right]} \exp\left(-\frac{r^2}{2\zeta^2}\right) \times 4\pi l r dr$$

or

$$dn_{ex} = \frac{n_{ex0}}{\zeta^2 \left[1 - \exp\left(-\frac{r_0^2}{2\zeta^2}\right)\right]} \exp\left(-\frac{r^2}{2\zeta^2}\right) \times r dr$$

The number of absorbed photons in accordance with the Lambert-Beer law is:

$$dn_{abs} = dn_{ex}(r, z) [1 - \exp(-\sigma_{01} N_0 2l)]$$

where  $\sigma_{01}$  is a cross section of the  $S_0 \rightarrow S_1$  transition at the excitation wavelength,  $N_0$  is a number of PS molecules per a volume unit, and

$$dn_{abs} = \frac{n_{ex0} [1 - \exp(-\sigma_{01} N_0 2l)]}{\zeta^2 \left[1 - \exp\left(-\frac{r_0^2}{2\zeta^2}\right)\right]} \exp\left(-\frac{r^2}{2\zeta^2}\right) r dr$$

When the radius of the analyzing beam  $l \ll r_0$ , the problem can be considered as a one-dimensional one, and the elementary absorbance can be written as:

$$dA = \sigma_S N_S dr + \sigma_T N_T dr$$

where  $\sigma_S$  and  $\sigma_T$  are cross sections of  $S_0 \rightarrow S_1$  and  $T_1 \rightarrow T_2$  transitions at the analyzing wavelength and  $N_S = \frac{dn_S}{dV_r}$  and  $N_T = \frac{dn_T}{dV_r}$  are numbers of the PS molecules in the  $S_1$  and  $T_1$  states per the volume unit, respectively.

Taking into account that  $N_S + N_T = N_0$  we obtain

$$d(\Delta A) = d(A - A_0) = (\sigma_T - \sigma_S)N_T dr = (\sigma_T - \sigma_S) \frac{dn_T}{4\pi l r dr} dr = (\sigma_T - \sigma_S) \frac{dn_T}{4\pi l r}$$

where  $A_0 = \int_{-r_0}^{r_0} \sigma_S N_0 dr$  is the absorbance of the sample before the exciting pulse action.

Using the definition of the triplet state quantum yield as  $\varphi_T = \frac{dn_T}{dn_{abs}}$ , we obtain after integration

$$\begin{aligned} \Delta A &= (\sigma_T - \sigma_S) \int_{-r_0}^{r_0} \frac{dn_T}{4\pi l r} = \frac{\varphi_T(\sigma_T - \sigma_S)}{4\pi l} \int_{-r_0}^{r_0} \frac{dn_{abs}}{r} \\ \Delta A &= \frac{\varphi_T(\sigma_T - \sigma_S)}{4\pi l} \times \frac{[1 - \exp(-\sigma_{01}N_0l)]}{\zeta^2 \left[1 - \exp\left(-\frac{r_0^2}{2\zeta^2}\right)\right]} \times \int_{-r_0}^{r_0} \exp\left(-\frac{r^2}{2\zeta^2}\right) dr \\ \Delta A &= \varphi_T \frac{n_{ex0}(\sigma_T - \sigma_S)}{2\pi l} \times \frac{[1 - \exp(-\sigma_{01}N_0l)]}{\zeta^2 \left[1 - \exp\left(-\frac{r_0^2}{2\zeta^2}\right)\right]} \times \int_0^{r_0} \exp\left(-\frac{r^2}{2\zeta^2}\right) dr \\ \Delta A &= \varphi_T \frac{n_{ex0}(\sigma_T - \sigma_S)}{2\pi l} \times \frac{[1 - \exp(-\sigma_{01}N_0l)]}{\zeta^2 \left[1 - \exp\left(-\frac{r_0^2}{2\zeta^2}\right)\right]} \sqrt{\frac{\pi}{2}} \zeta \times \operatorname{erf}\left(-\frac{r^2}{2\zeta^2}\right) \\ \Delta A &= \varphi_T \frac{n_{ex0}(\sigma_T - \sigma_S)}{2\sqrt{2\pi}l\zeta} \times \frac{[1 - \exp(-\sigma_{01}N_0l)]}{\left[1 - \exp\left(-\frac{r_0^2}{2\zeta^2}\right)\right]} \times \operatorname{erf}\left(-\frac{r^2}{2\zeta^2}\right) \end{aligned}$$

where

$$\operatorname{erf}(x) = \frac{2}{\sqrt{\pi}} \int_0^{x^2} \exp(-t^2) dt = \frac{1}{\sqrt{\pi}} \int_0^{x^2} \exp(-t) \frac{dt}{\sqrt{t}}$$

is the error integral with the argument  $x = \frac{r_0}{\sqrt{2}\zeta}$ .

And as a result

$$\varphi_T = \frac{2\sqrt{2\pi}l\zeta}{n_{ex0}(\sigma_T - \sigma_S)} \times \frac{\left[1 - \exp\left(-\frac{r_0^2}{2\zeta^2}\right)\right]}{\left[1 - \exp(-\sigma_{01}N_0l)\right] \operatorname{erf}\left(\frac{r_0}{\sqrt{2}\zeta}\right)} \times \Delta A$$
